# Supplementary material for: Excessive Hypoxia‐Inducible Factor‐1α Expression Induces Cardiac Rupture via p53‐Dependent Apoptosis After Myocardial Infarction
Source: PubMed Central journal article supplement — J Am Heart Assoc. 2021 Sep 2;10(17):e020895. doi: 10.1161/JAHA.121.020895 (PMC8649270; doi:10.1161/jaha.121.020895), 2021-09-02
Supplement: JAH3-10-e020895-s001.pdf [file JAH3-10-e020895-s001.pdf]

# **SUPPLEMENTAL MATERIAL**

**Table S1. Primer sequences used in this study.**

| <b>Rattus norvegicus</b> | <b>F/R</b> | <b>primer sequence</b>    |
|--------------------------|------------|---------------------------|
| <i>Rps18</i>             | F          | AAGTTTCAGCACATCCTGCGAGTA  |
|                          | R          | TTGGTGAGGTCAATGTCTGCTTTC  |
| <i>Tp53</i>              | F          | TCCAGTTCATTGGGACTTATCCTTG |
|                          | R          | GCTCATATCCGACTGTGAATCCTC  |
| <i>Mmp2</i>              | F          | TCCCGAGATCTGCAAGCAAG      |
|                          | R          | AGAATGTGGCCACCAGCAAG      |
| <i>Mmp9</i>              | F          | AGCCGGGAACGTATCTGGA       |
|                          | R          | TGGAAACTCACACGCCAGAAG     |
| <i>Timp1</i>             | F          | CATCTCTGGCCTCTGGCATC      |
|                          | R          | CATAACGCTGGTATAAGGTGGTCTC |
| <i>Timp2</i>             | F          | GACACGCTTAGCATCACCCAGA    |
|                          | R          | CTGTGACCCAGTCCATCCAGAG    |
| <i>Timp3</i>             | F          | AGGGCTGTGCAACTTTGTGG      |
|                          | R          | TCTTGGAGGTCACAAAGCAAGG    |
| <i>Timp4</i>             | F          | GCCTGAATCATCACTACCACCAGA  |
|                          | R          | GAGATGGTACACGGCACTGCATA   |

**Figure S1. Dose-dependency of cobalt chloride (CoCl<sub>2</sub>) for Hif-1 $\alpha$ , p53, and cleaved caspase (CC)-3 expression in isolated cardiomyocytes under PHD inhibition.**

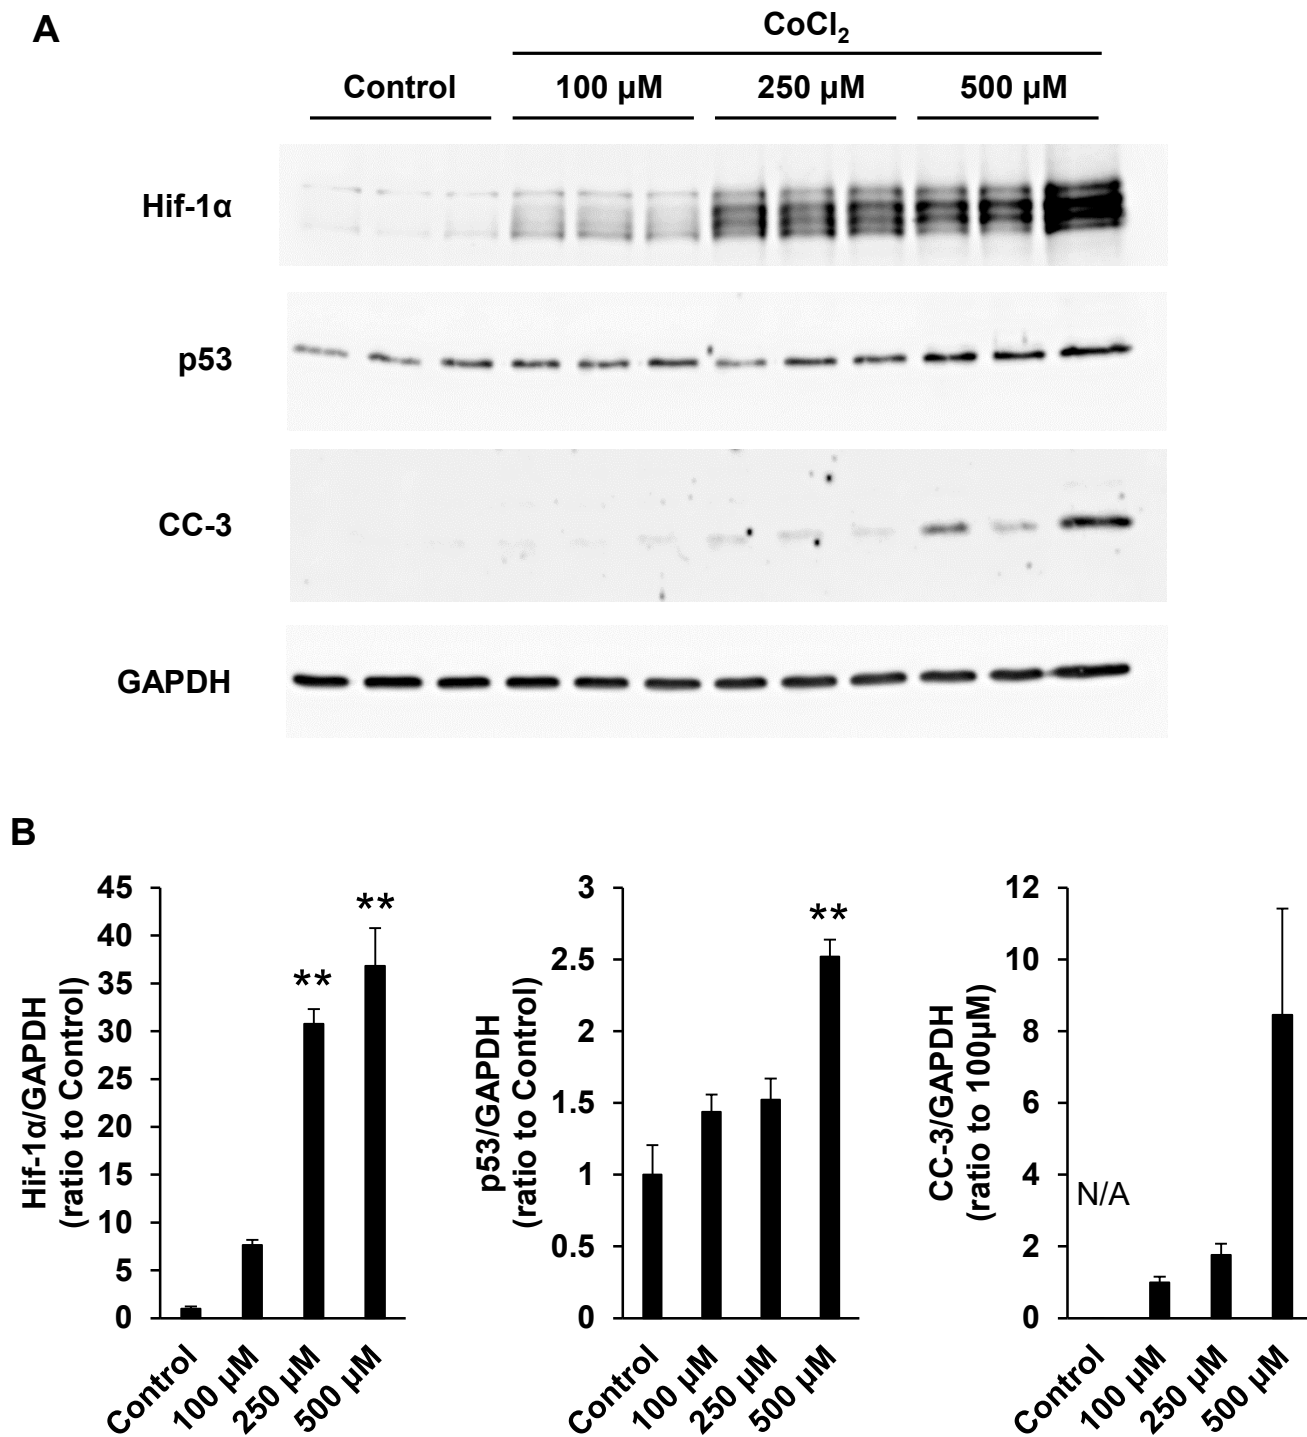

**A**, Expression of Hif-1 $\alpha$ , p53, and CC-3 in cultured cardiomyocytes under CoCl<sub>2</sub> treatment. GAPDH was used as a loading control. **B**, Quantification of western blots shown in Figure S1A; n = 3 in each group. Data are shown as the mean  $\pm$  SEM. \* $P$  < 0.05, \*\* $P$  < 0.01 vs. Control, analyzed using Dunnett's test.

**Figure S2. Physiological parameters in CTL and caHetKO mice at day 5 after MI.**

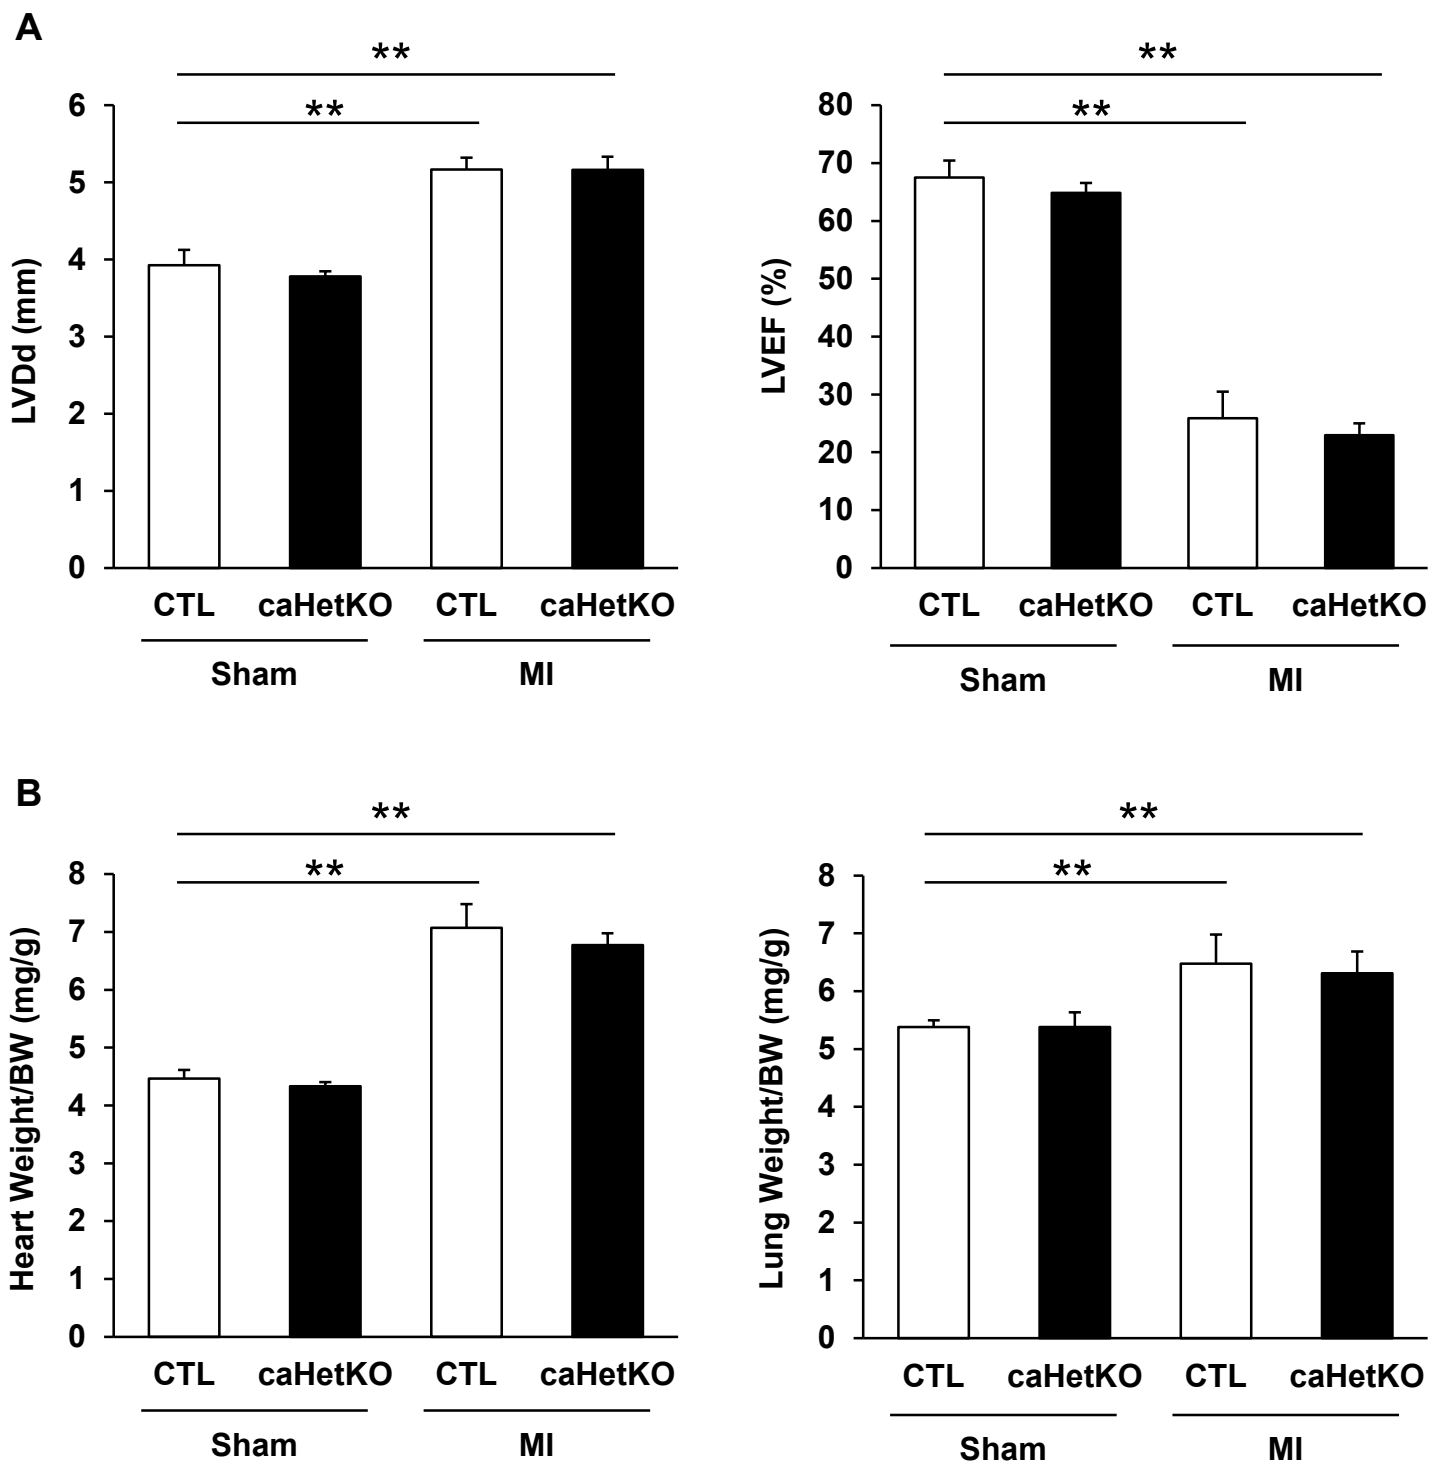

**A**, Echocardiographic measurements (left ventricular diameter in diastole [LVDDd] and left ventricular ejection fraction [LVEF]) in CTL and caHetKO mice at day 5 after MI. **B**, Heart and lung weights in CTL and caHetKO mice at day 5 after MI. Data are shown as the mean  $\pm$  SEM. \*\* $P < 0.01$  vs. Control, analyzed using one-way ANOVA, followed by Tukey's post-hoc test.

**Figure S3. Cleavage of caspase-8 induced by cobalt chloride (CoCl<sub>2</sub>) treatment in cultured cardiomyocytes, transfected with siRNA targeting Hif-1 $\alpha$  and p53.**

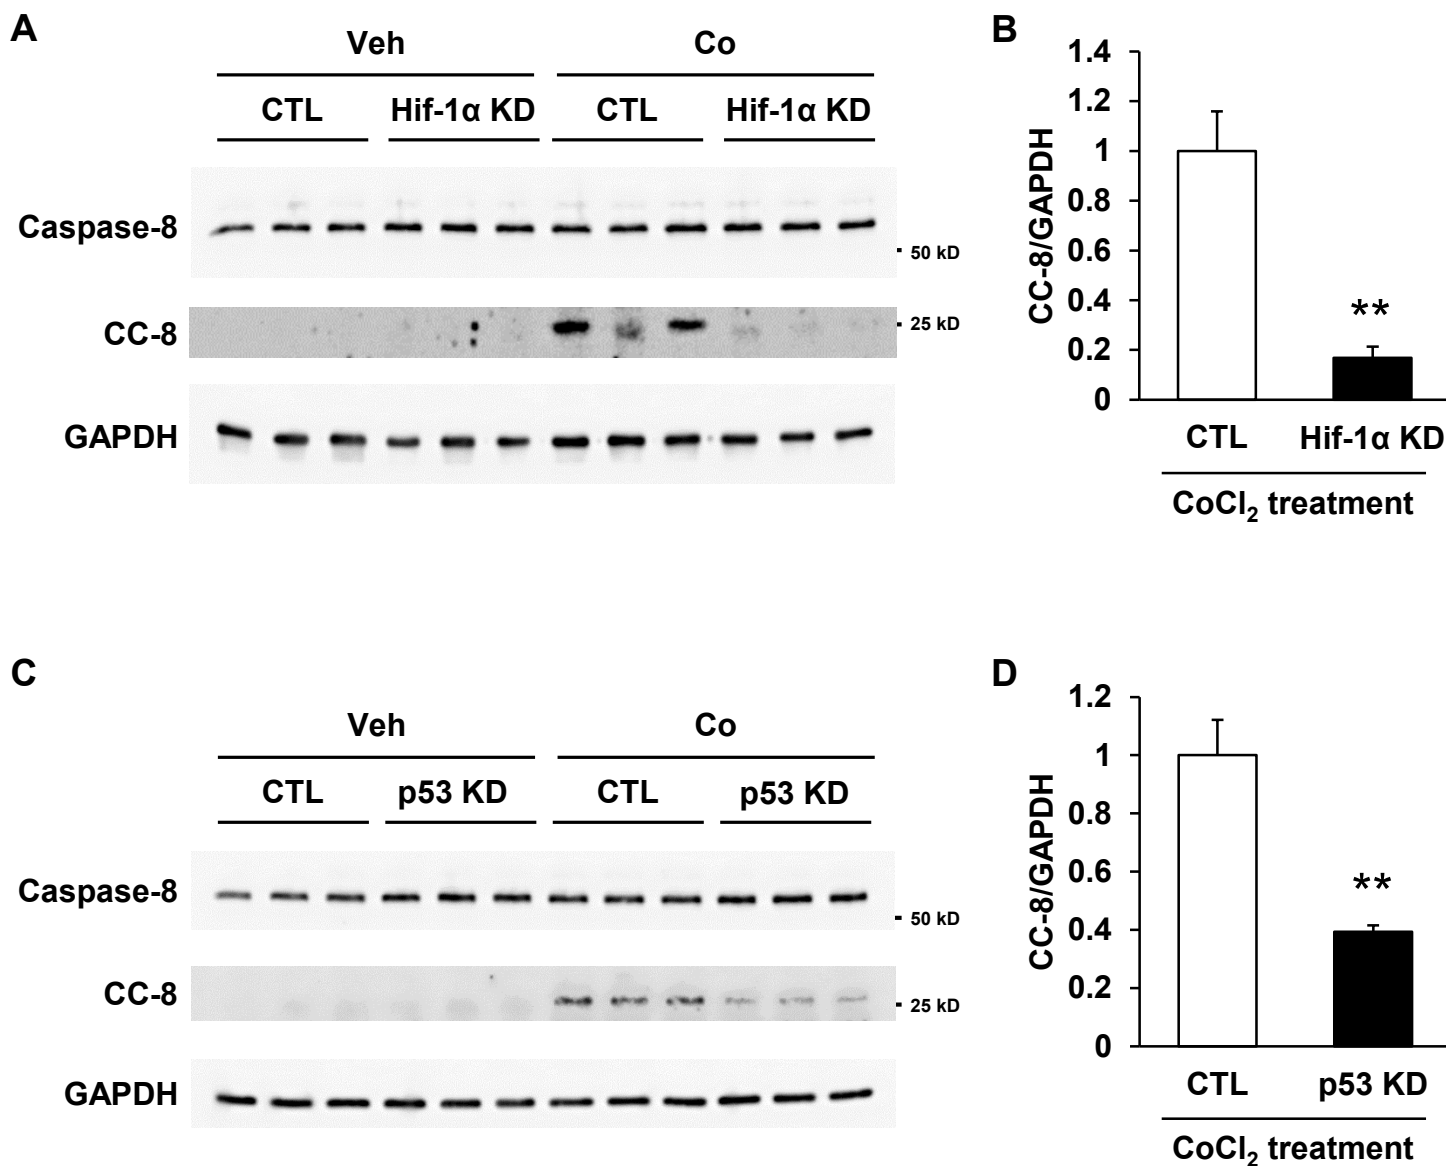

**A**, Expression of cleaved caspase-8 in cultured cardiomyocytes under CoCl<sub>2</sub> treatment, transfected with siRNA targeting Hif-1 $\alpha$ . GAPDH was used as a loading control. **B**, Quantification of western blots shown in Figure S3A; n = 3 in each group. **C**, Expression of cleaved caspase-8 in cultured cardiomyocytes under CoCl<sub>2</sub> treatment, transfected with siRNA targeting p53. GAPDH was used as a loading control. **D**, Quantification of western blots shown in Figure S3C; n = 3 in each group. Data are shown as the mean  $\pm$  SEM. \*\**P* < 0.01 vs. Control, analyzed using one-way ANOVA, followed by Student's *t*-test.

**Figure S4. Transcriptional expression of matrix-metalloproteinases (MMPs) and tissue inhibitors of metalloproteinases (TIMPs) under cobalt chloride (CoCl<sub>2</sub>) treatment in cultured cardiomyocytes, transfected with siRNA targeting Hif-1 $\alpha$  and p53.**

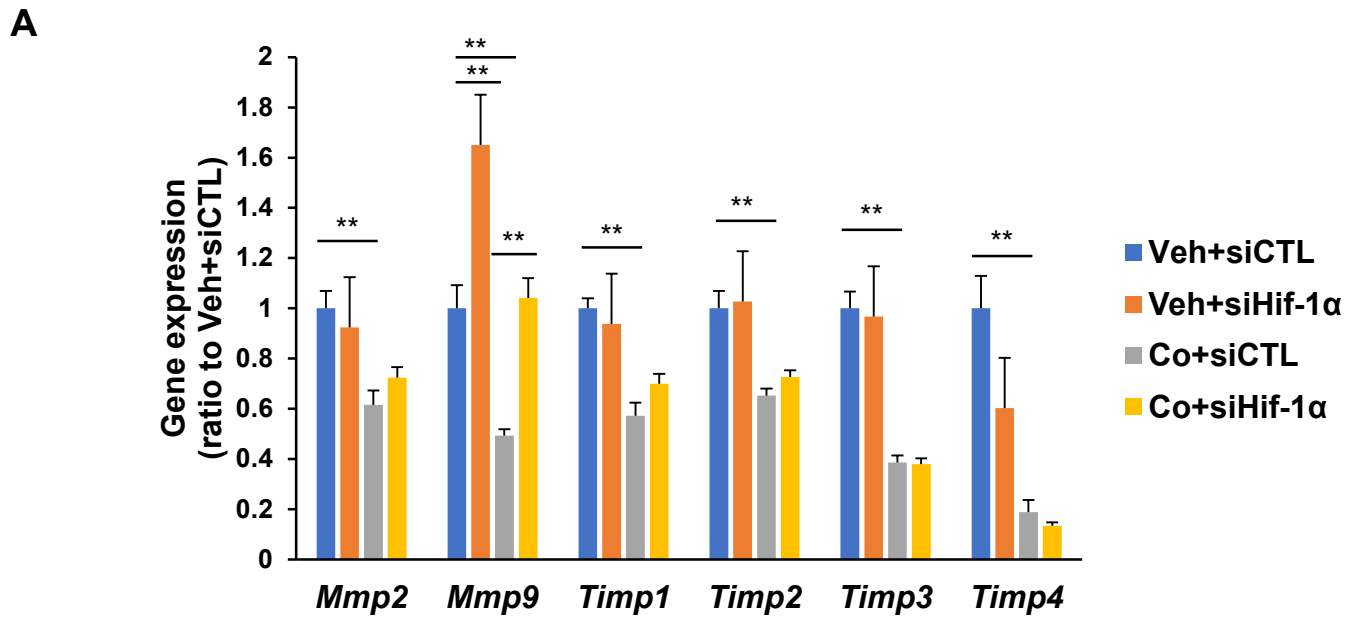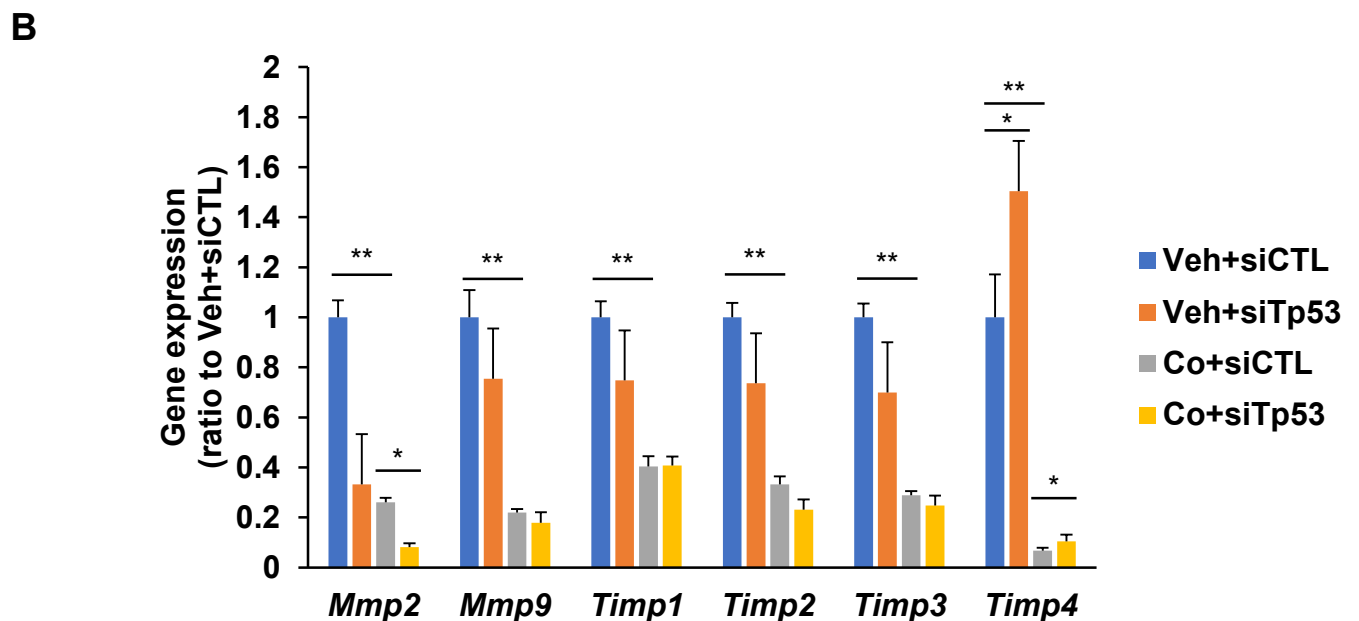

**A**, *Mmp2*, *Mmp9*, *Timp1*, *Timp2*, *Timp3*, and *Timp4* expression in cultured cardiomyocytes treated with vehicle (Veh) and cobalt chloride (CoCl<sub>2</sub>, 500  $\mu$ M) for 24 h, or transfected with siRNA for control (scramble siRNA) and Hif-1 $\alpha$ , was quantified by real-time PCR; n = 6 in each group. **B**, *Mmp2*, *Mmp9*, *Timp1*, *Timp2*, *Timp3*, and *Timp4* expression in cultured cardiomyocytes treated with Veh and CoCl<sub>2</sub> (500  $\mu$ M) for 24 h, or transfected with siRNA for control (scramble siRNA) and p53, was quantified by real-time PCR; n = 6 in each group. Data are shown as the mean  $\pm$  SEM. \**P* < 0.05, \*\**P* < 0.01, analyzed using one-way ANOVA, followed by Tukey's post-hoc test.

**Figure S5. Physiological parameters in CTL and caHetKO mice at the time of sacrifice in survival study.**

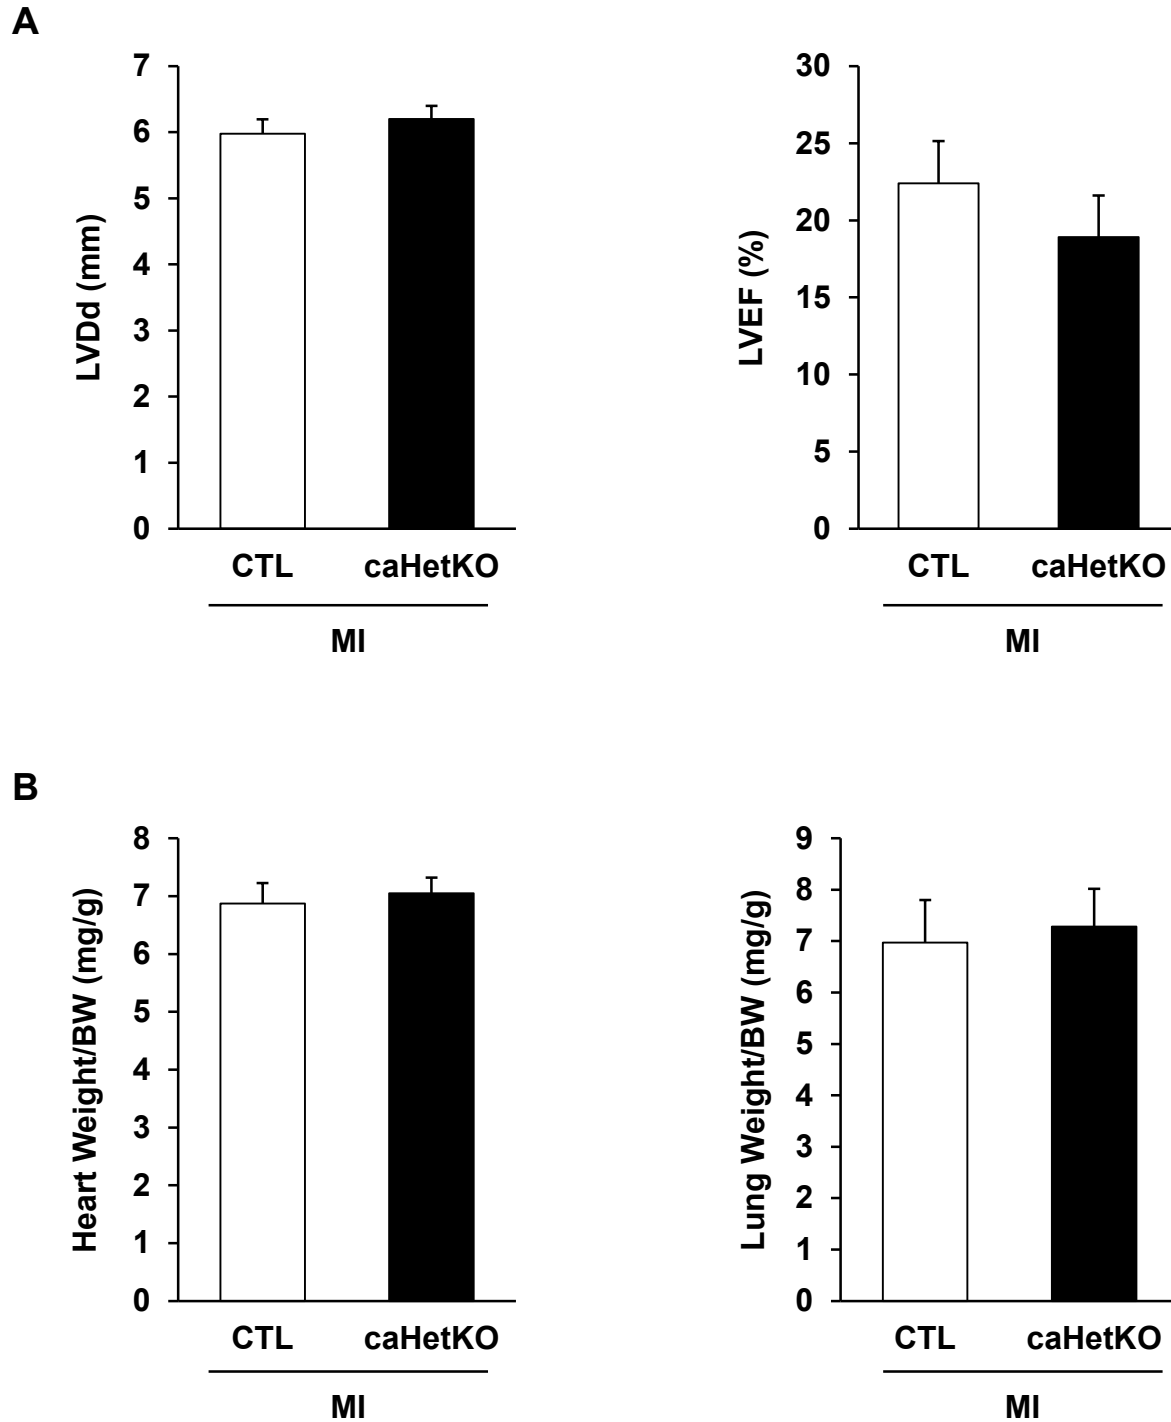

**A**, Echocardiographic measurements (left ventricular diameter in diastole [LVDd] and left ventricular ejection fraction [LVEF]) in CTL and caHetKO. **B**, Heart and lung weights in CTL and caHetKO mice. Data are shown as the mean  $\pm$  SEM.

## Figure S6. Cleavage of caspase-1 in the border zone of myocardial infarction (MI).

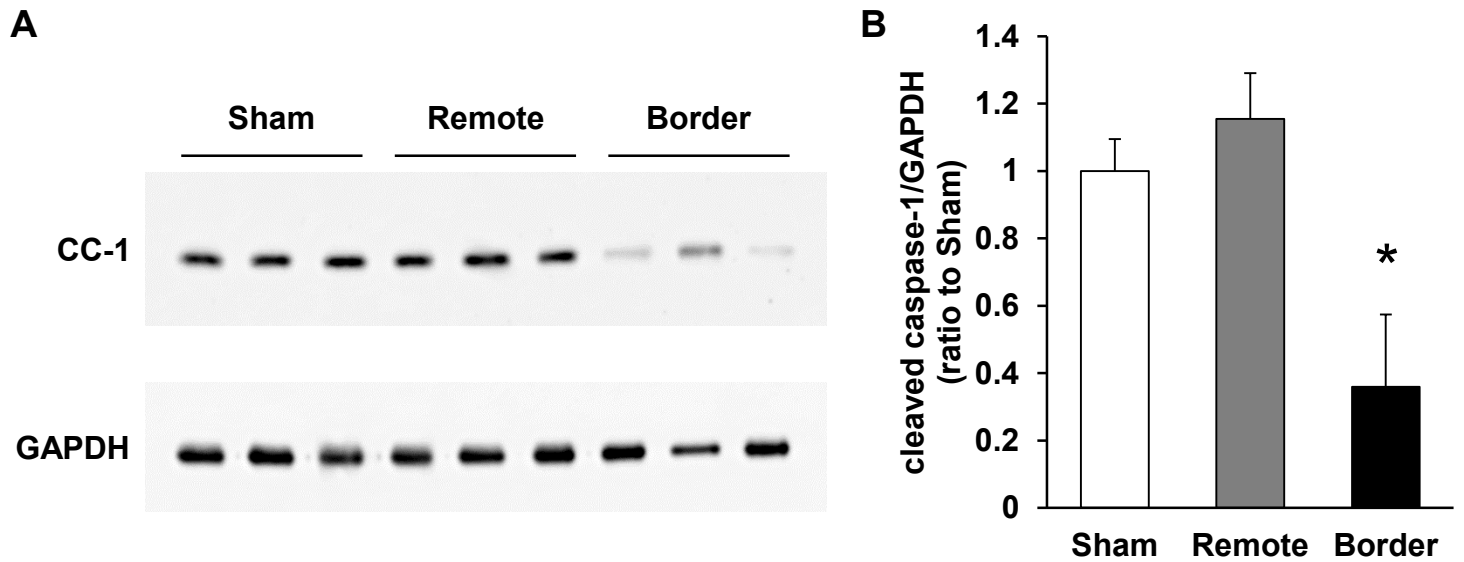

**A**, Western blots of cleaved caspase (CC)-1 in the MI border zone. Glyceraldehyde 3-phosphate dehydrogenase (GAPDH) was used as a loading control. **B**, Quantification of western blots shown in Figure S6A;  $n = 3$  in each group.  $*P < 0.05$ , analyzed by Dunnett's test vs. Sham. Data are shown as a ratio to the Sham group.
